# Supplementary material for: Variation in hospital morbidities in an Australian neonatal intensive care unit network
Source: HighWire-hosted journal article supplement (doi:10.1136/archdischild-2022-324940), 2023-01-02
Supplement: archdischild-2022-324940supp001_data_supplement.pdf [file archdischild-2022-324940supp001_data_supplement.pdf]

**SUPPLEMENTARY MATERIALS:**

**Supplementary Figure 1 to 12:** Funnel plot showing unadjusted (panel A) and risk-adjusted (panel B) neonatal morbidity rates in Neonatal Intensive Care Units in NSW and the ACT between 2007-2020. A solid horizontal line represents the overall network average while the 95% (2.5<sup>th</sup> percentile represents the lower control limit and 97.5<sup>th</sup> percentile represents the upper control limit) and 99.8% (0.1<sup>th</sup> percentile represents the lower control limit and 99.9<sup>th</sup> percentile represents the upper control limit) control limits are represented by the curved dotted lines.

Figure 1: Proven early sepsis

Figure 2: Proven late sepsis

Figure 3: Intraventricular haemorrhage grade III and IV

Figure 4: Medically treated patent ductus arteriosus

Figure 5: Surgically treated patent ductus arteriosus

Figure 6: Necrotising enterocolitis clinically or proven radiologically or at surgery

Figure 7: Chronic lung disease

Figure 8: Postnatal steroid for chronic lung disease

Figure 9: Retinopathy of prematurity grade III to V

Figure 10: Surgery for retinopathy of prematurity

Figure 11: Hospital mortality

Figure 12: Home oxygen

**Supplementary Table 1 to 12:** Risk factors associated with each morbidity used for adjusted rates

Table 1: Proven early sepsis

Table 2: Proven late sepsis

Table 3: Intraventricular haemorrhage grade III and IV

Table 4: Medically treated patent ductus arteriosus

Table 5: Surgically treated patent ductus arteriosus

Table 6: Necrotising enterocolitis clinically or proven radiologically or at surgery

Table 7: Chronic lung disease

Table 8: Postnatal steroids for chronic lung disease

Table 9: Retinopathy of prematurity grade III to V

Table 10: Surgery for retinopathy of prematurity

Table 11: Hospital mortality

Table 12: Home oxygen

**Supplementary Figure 1 to 12:** Funnel plot showing unadjusted (panel A) and risk-adjusted (panel B) neonatal morbidity rates in Neonatal Intensive Care Units in NSW and the ACT between 2007-2020. A solid horizontal line represents the overall network average while the 95% (2.5<sup>th</sup> percentile represents the lower control limit and 97.5<sup>th</sup> percentile represents the upper control limit) and 99.8% (0.1<sup>th</sup> percentile represents the lower control limit and 99.9<sup>th</sup> percentile represents the upper control limit) control limits are represented by the curved dotted lines.

**Figure 1: Proven early sepsis.**

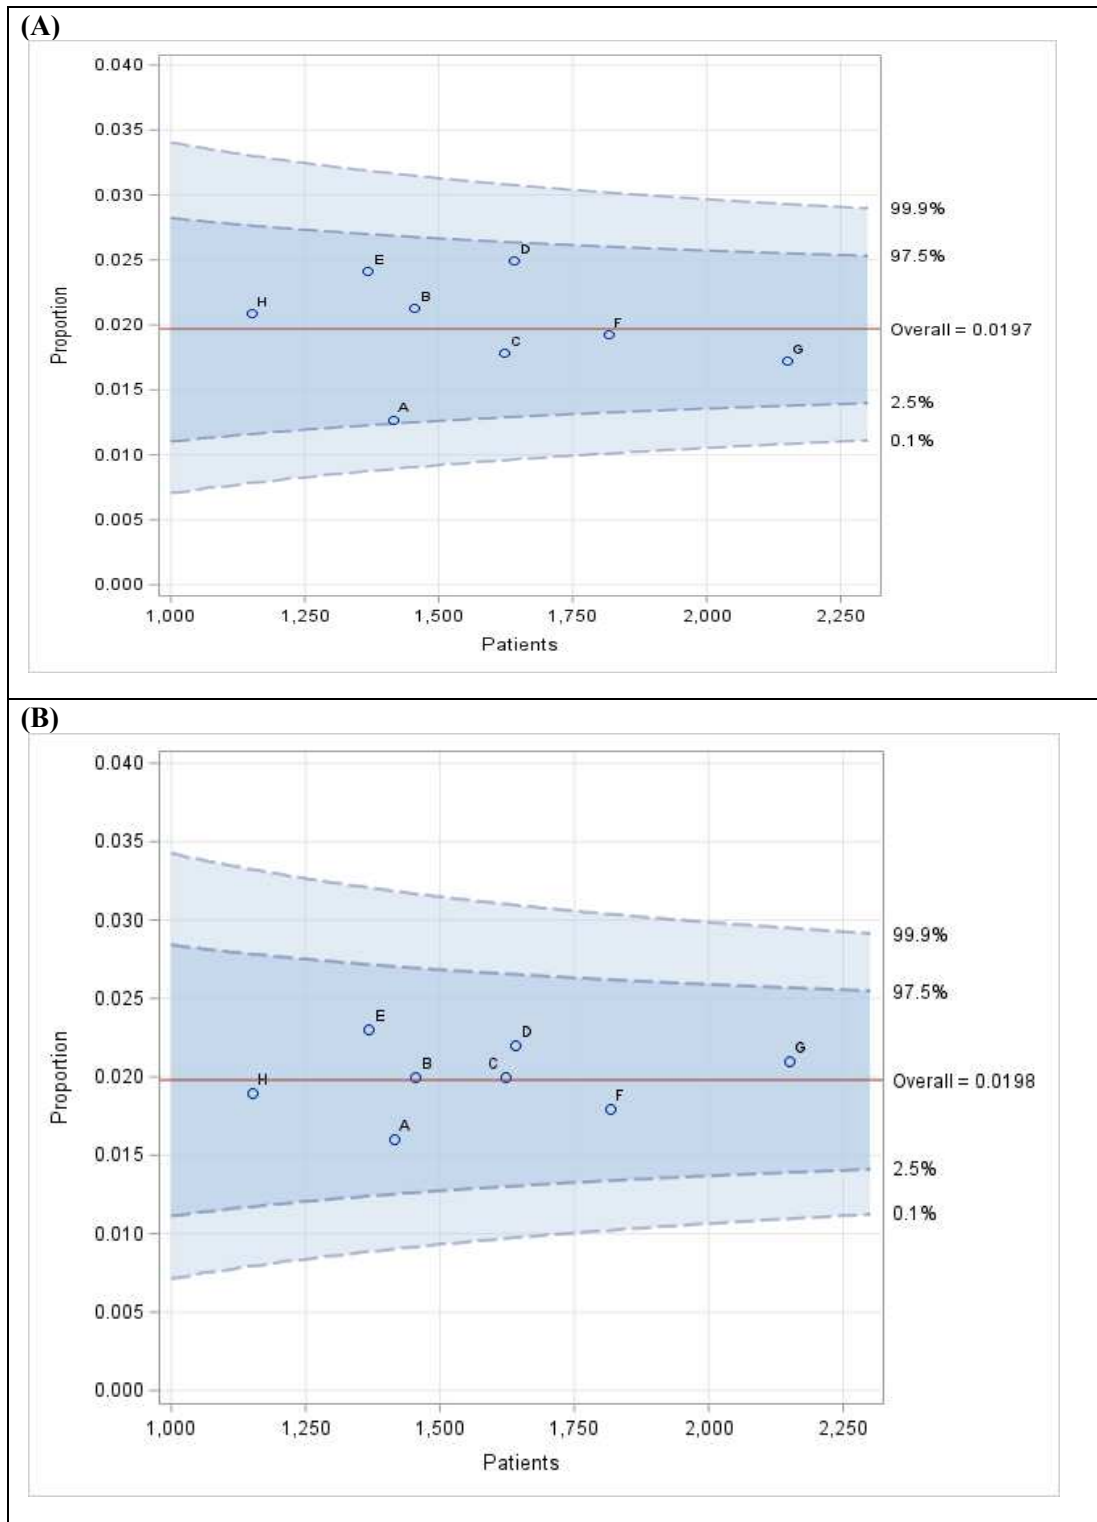

**Figure 2: Proven late sepsis.**

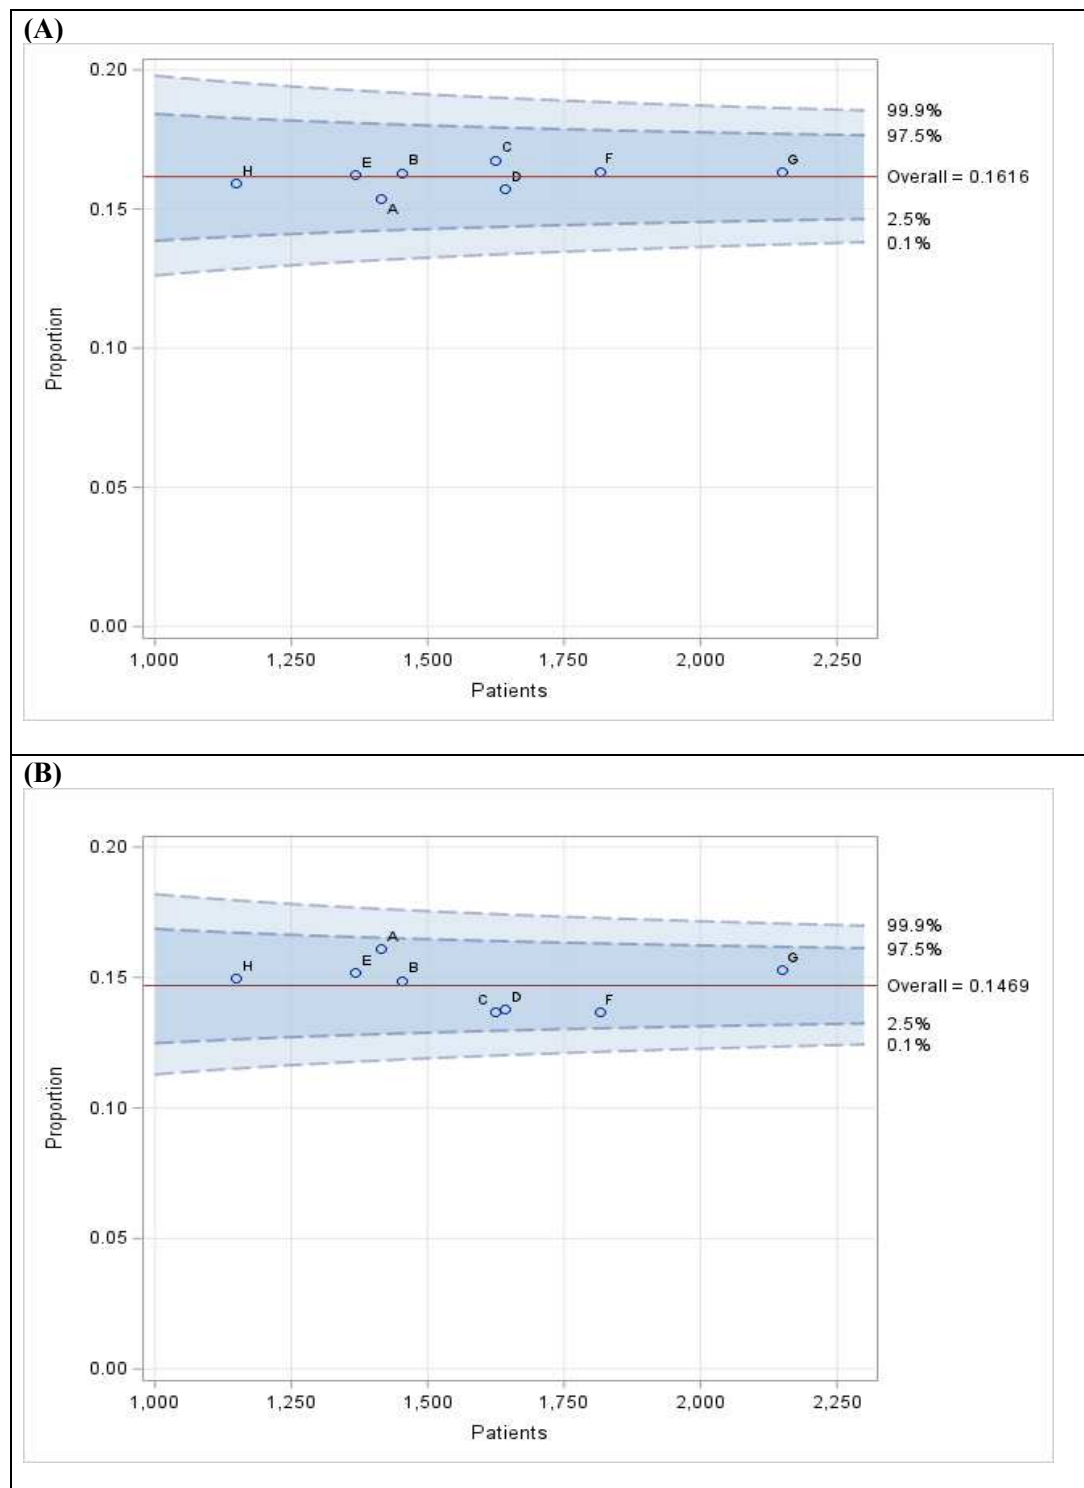

**Figure 3: Intraventricular haemorrhage grade III and IV.**

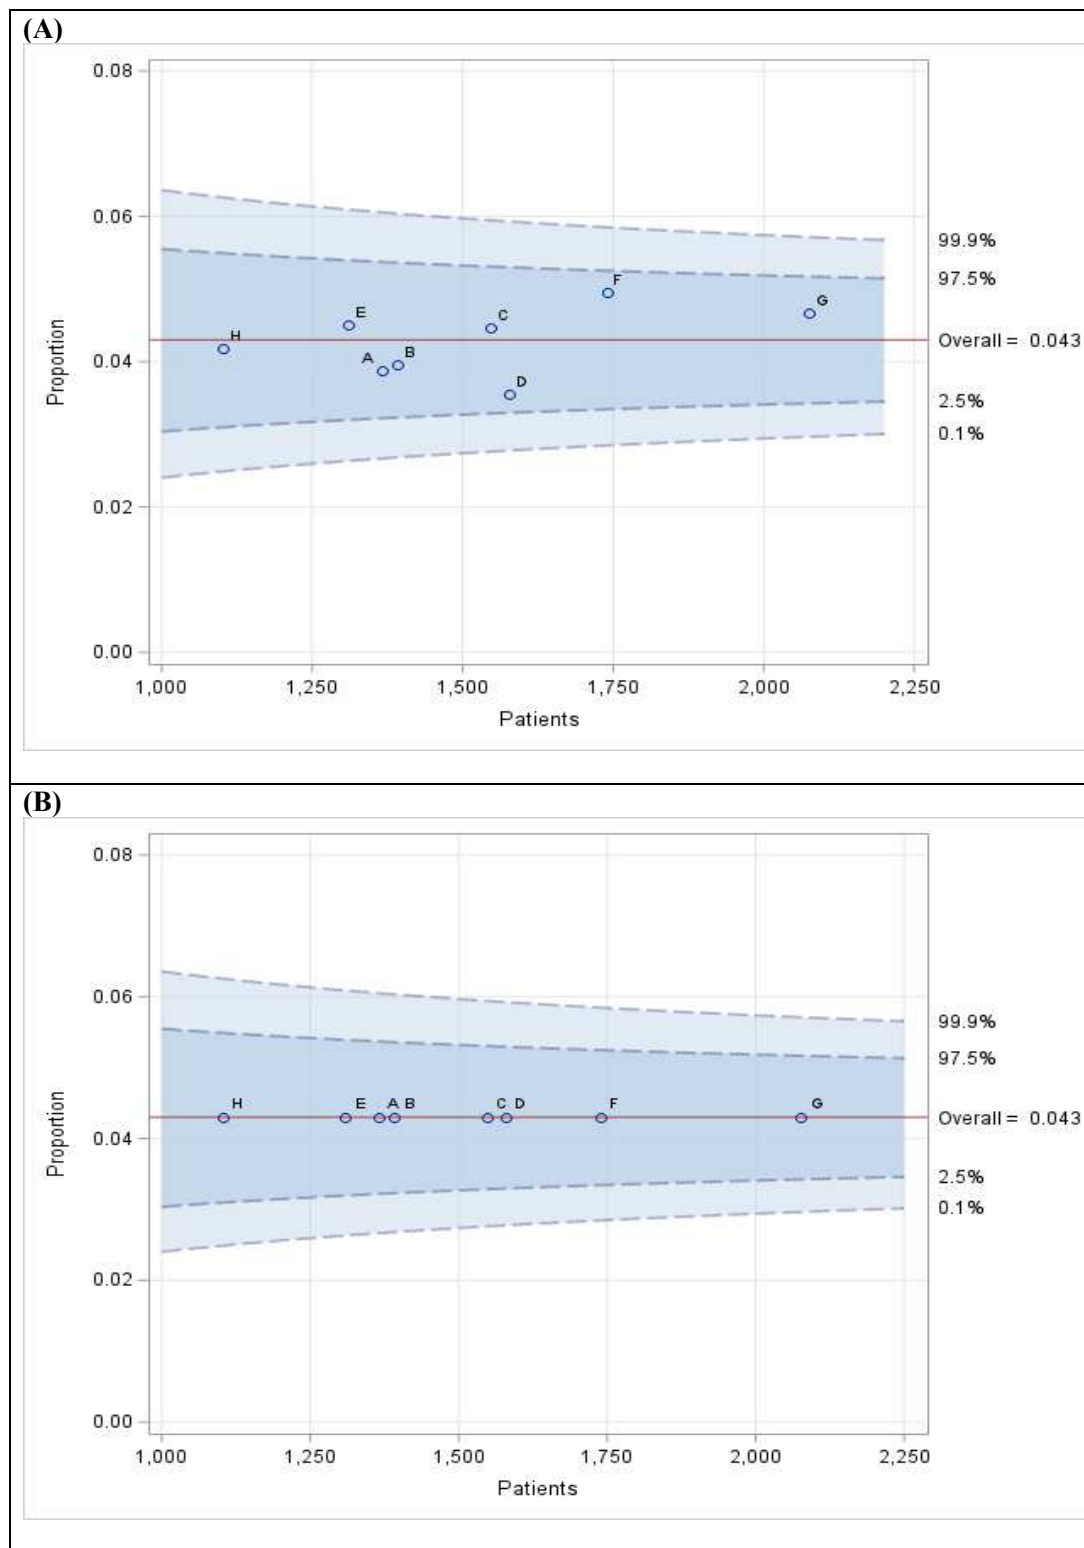

**Figure 4:** Medically treated patent ductus arteriosus.

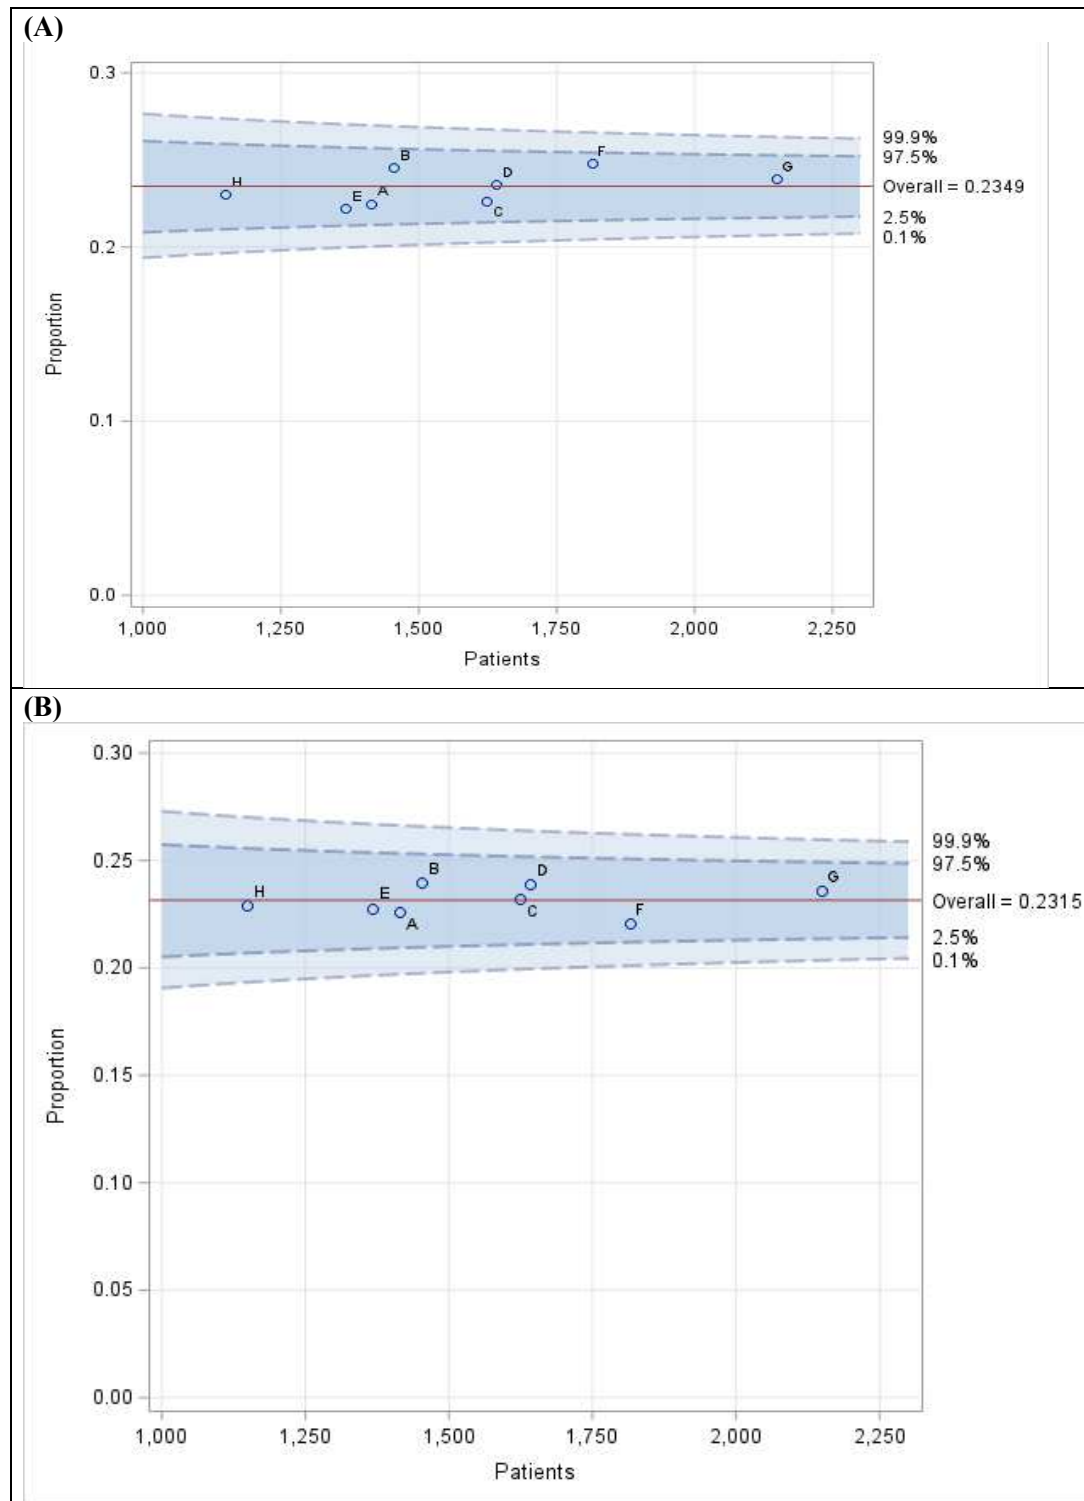

**Figure 5:** Surgically treated patent ductus arteriosus.

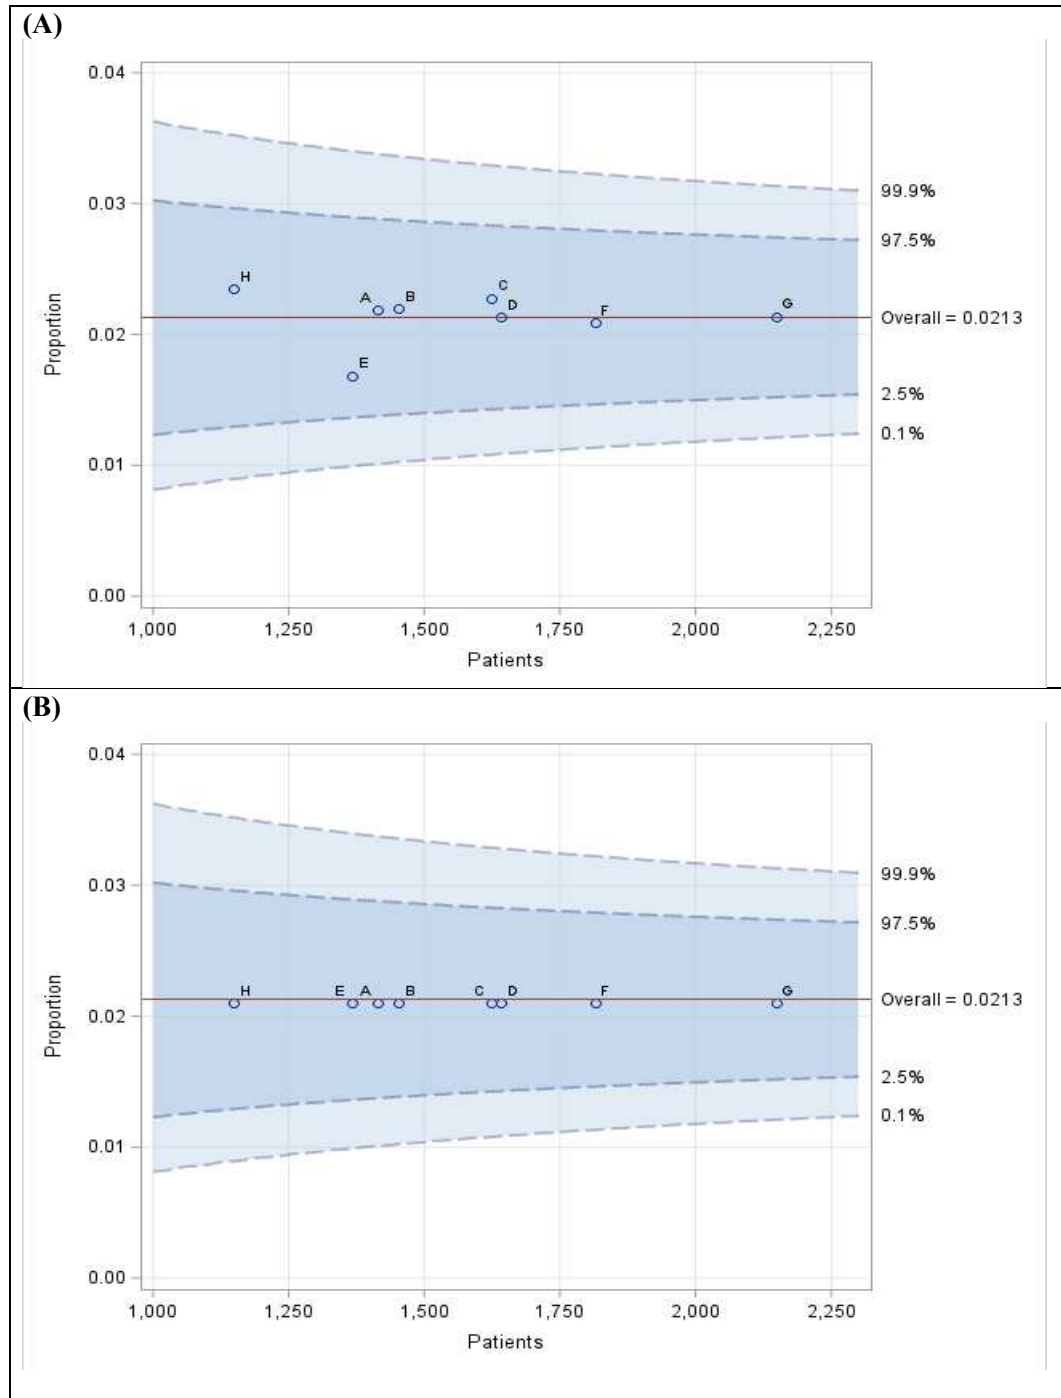

**Figure 6:** Necrotising enterocolitis diagnosed clinically or proven radiologically or at surgery.

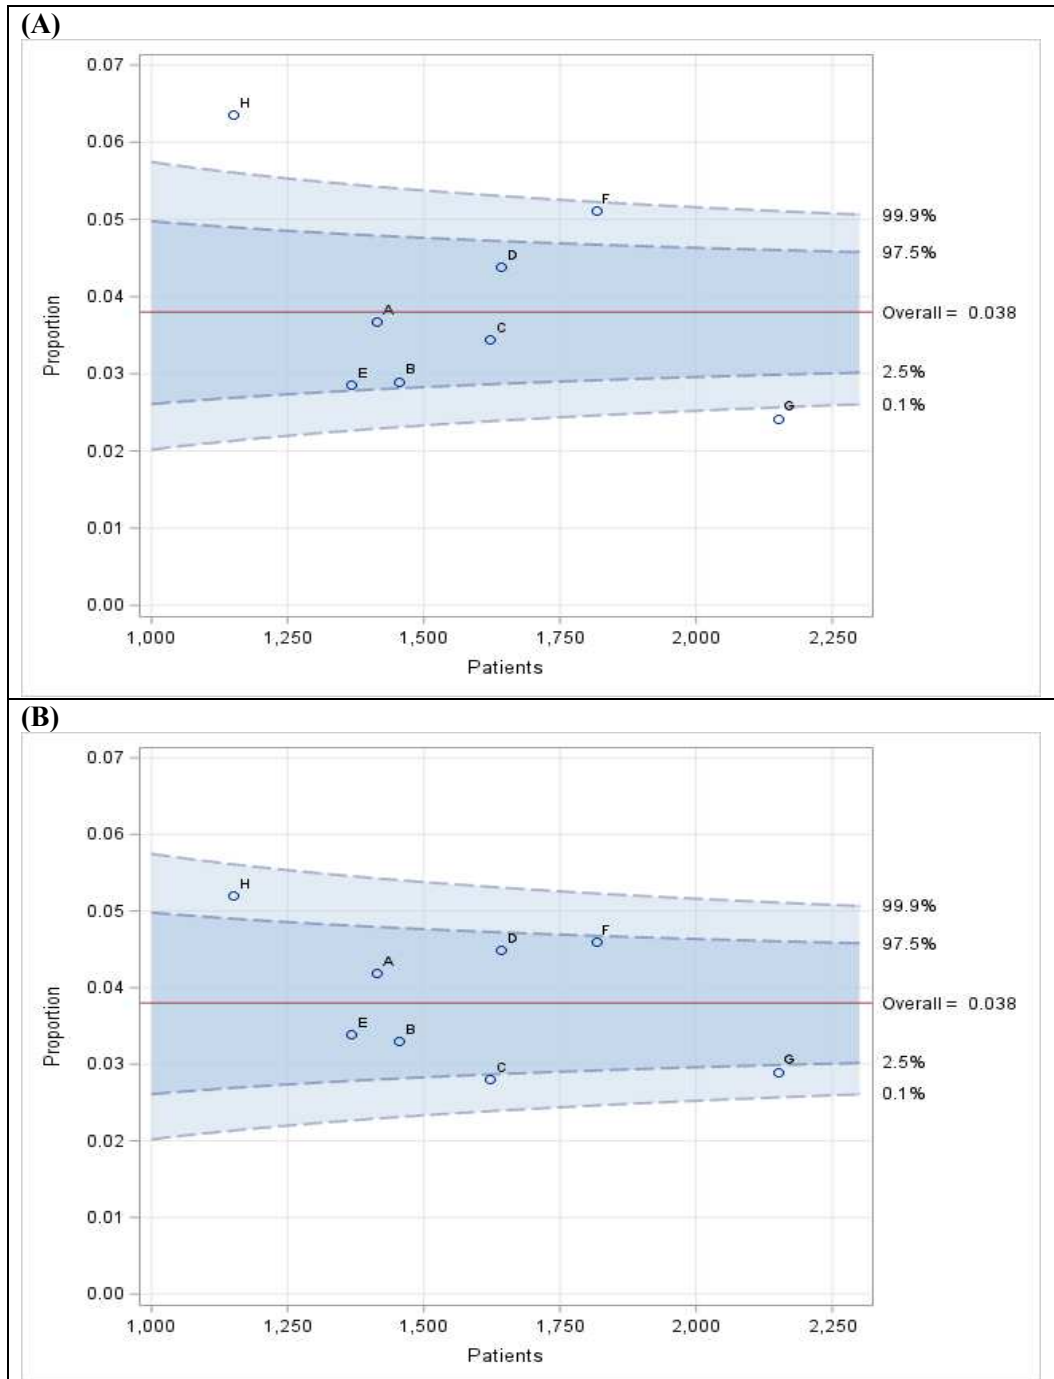



**Figure 7:** Chronic lung disease.

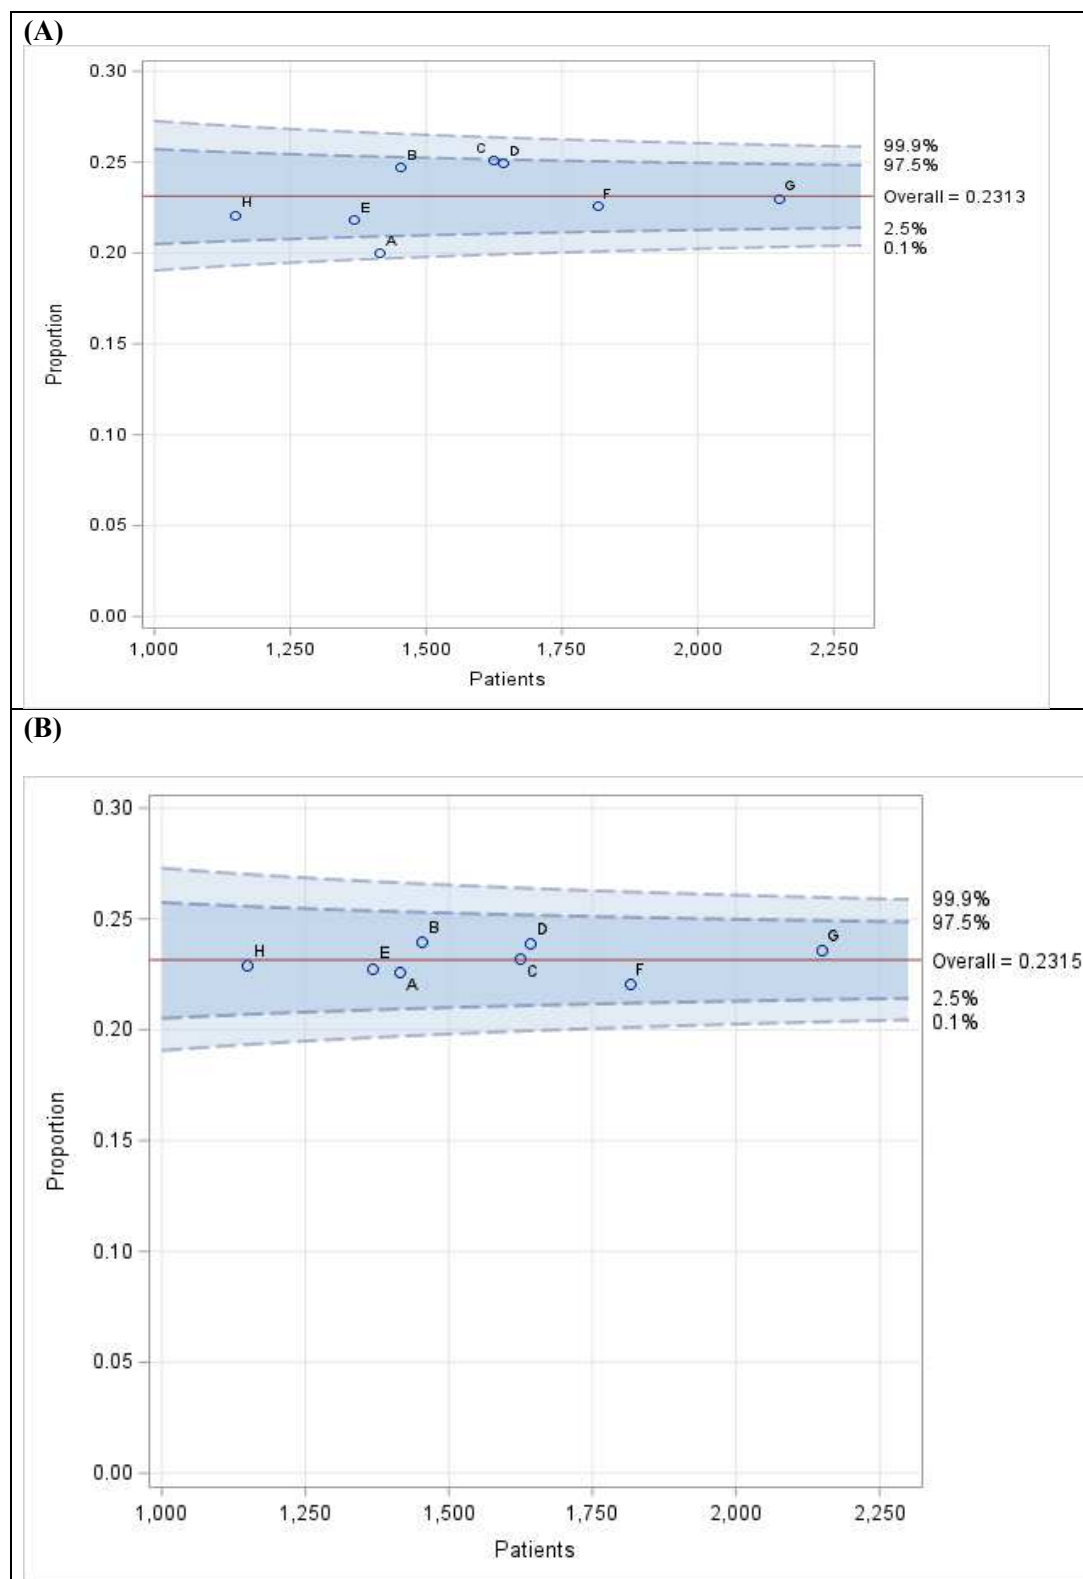

**Figure 8:** Postnatal steroid for chronic lung disease.

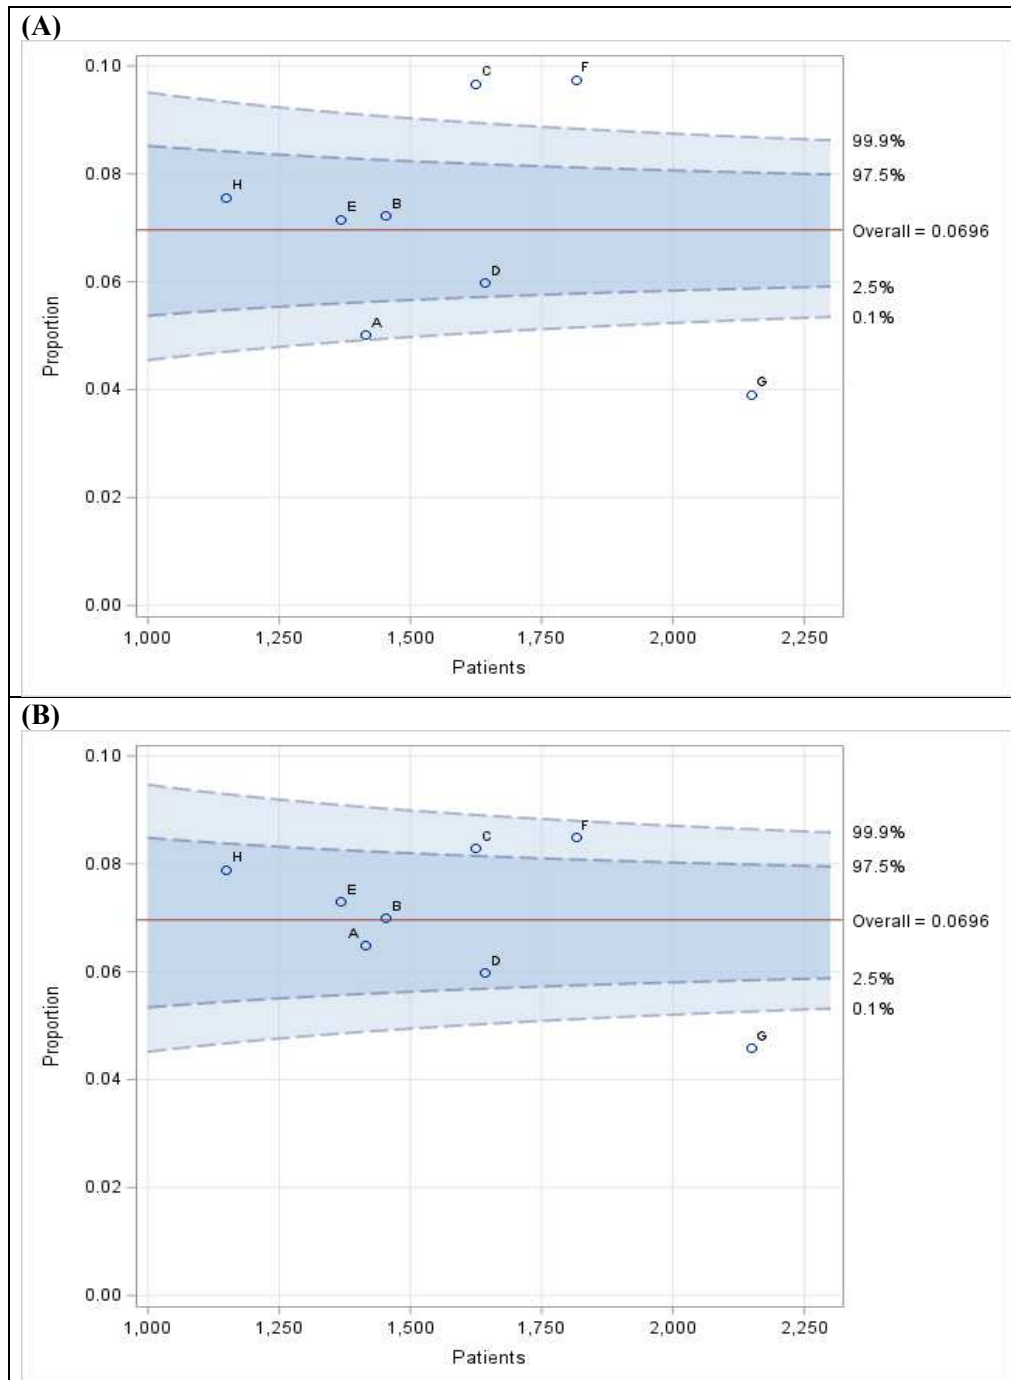

**Figure 9:** Retinopathy of prematurity grade III to V.

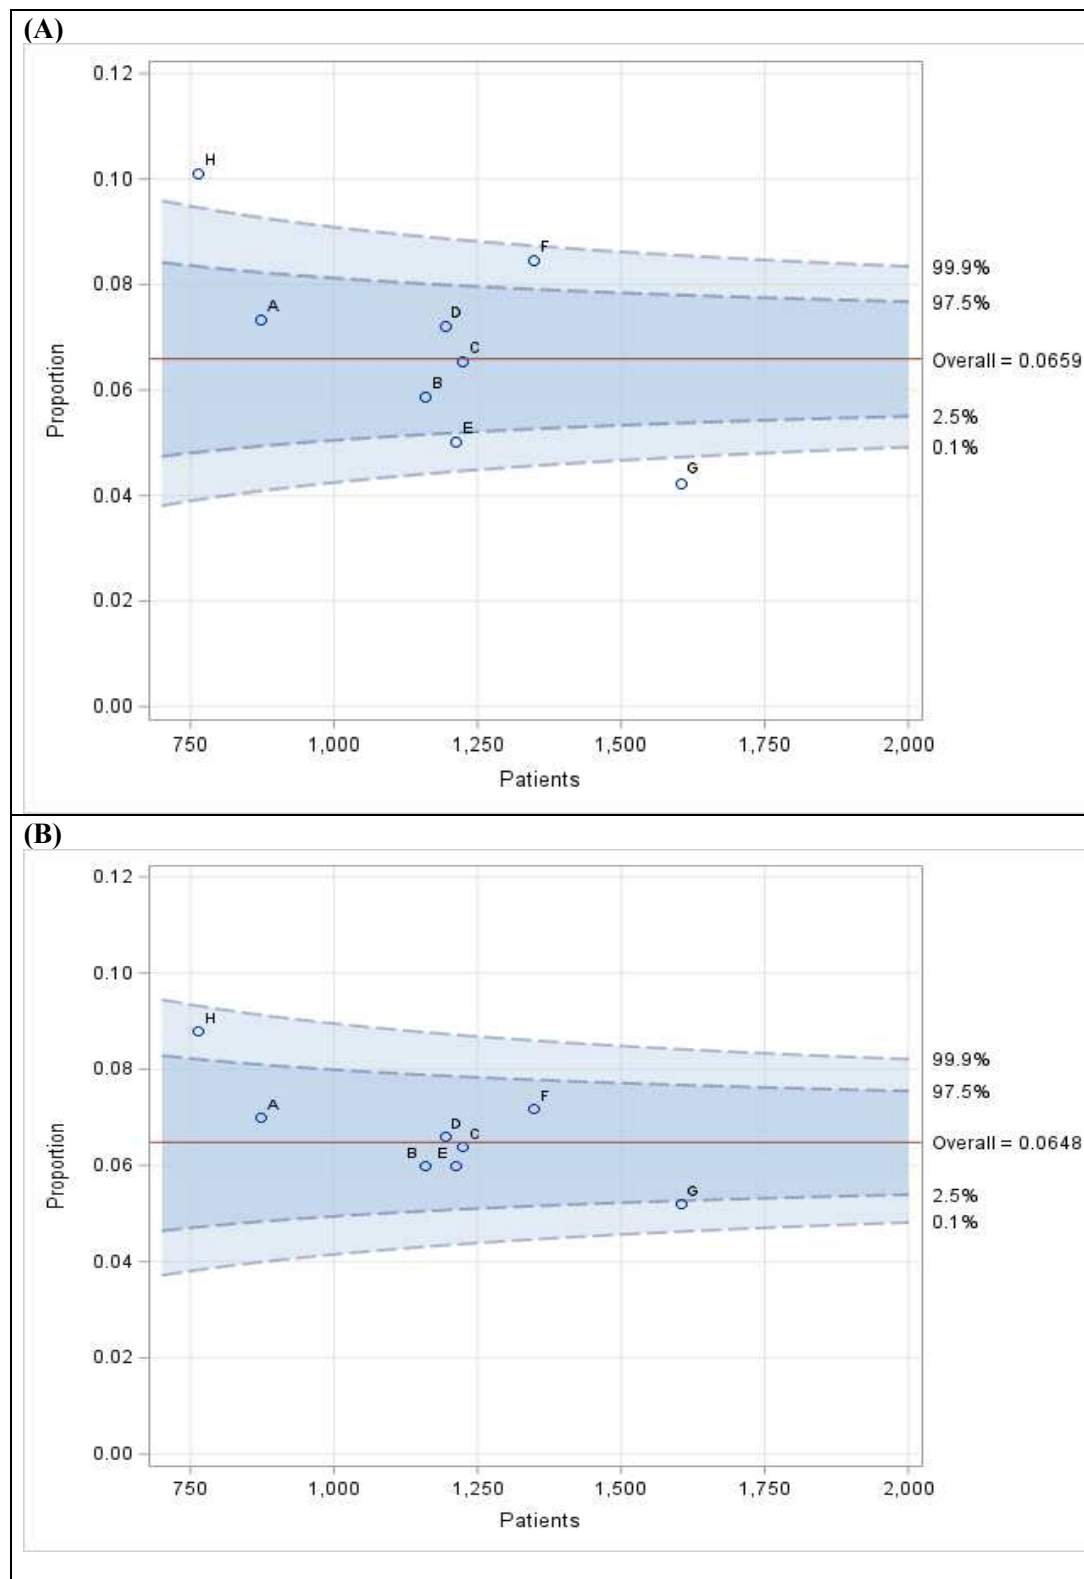

**Figure 10:** Surgery for retinopathy of prematurity.

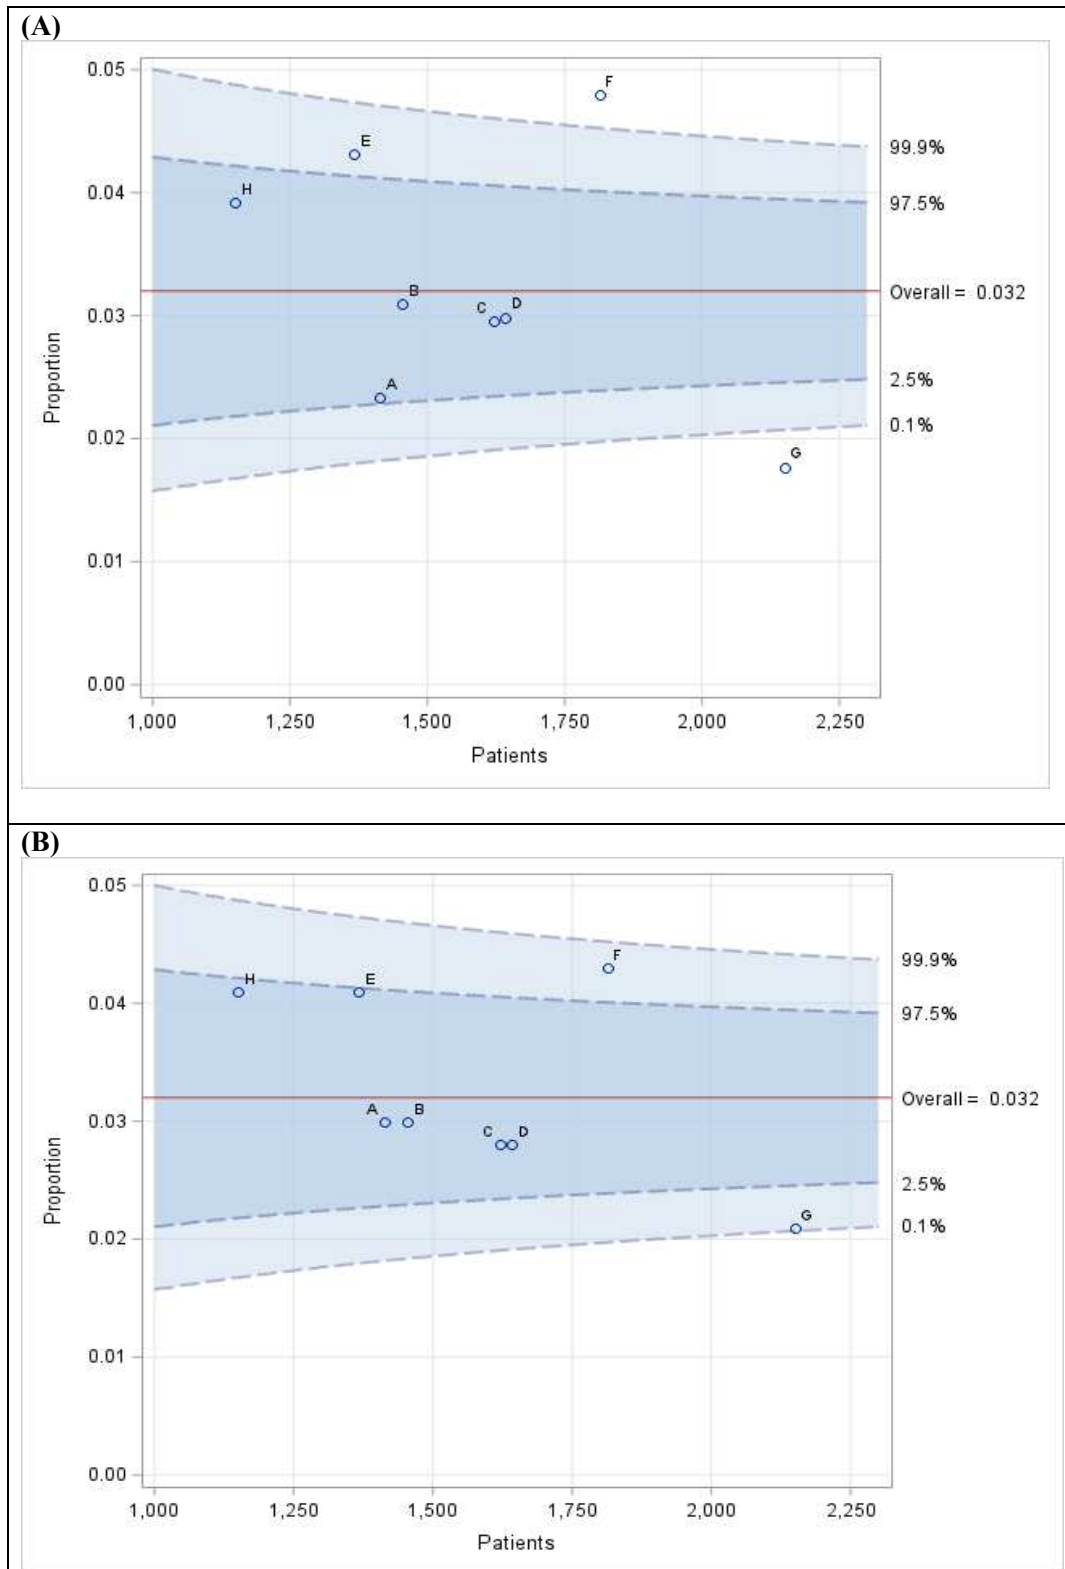

**Figure 11: Hospital mortality.**

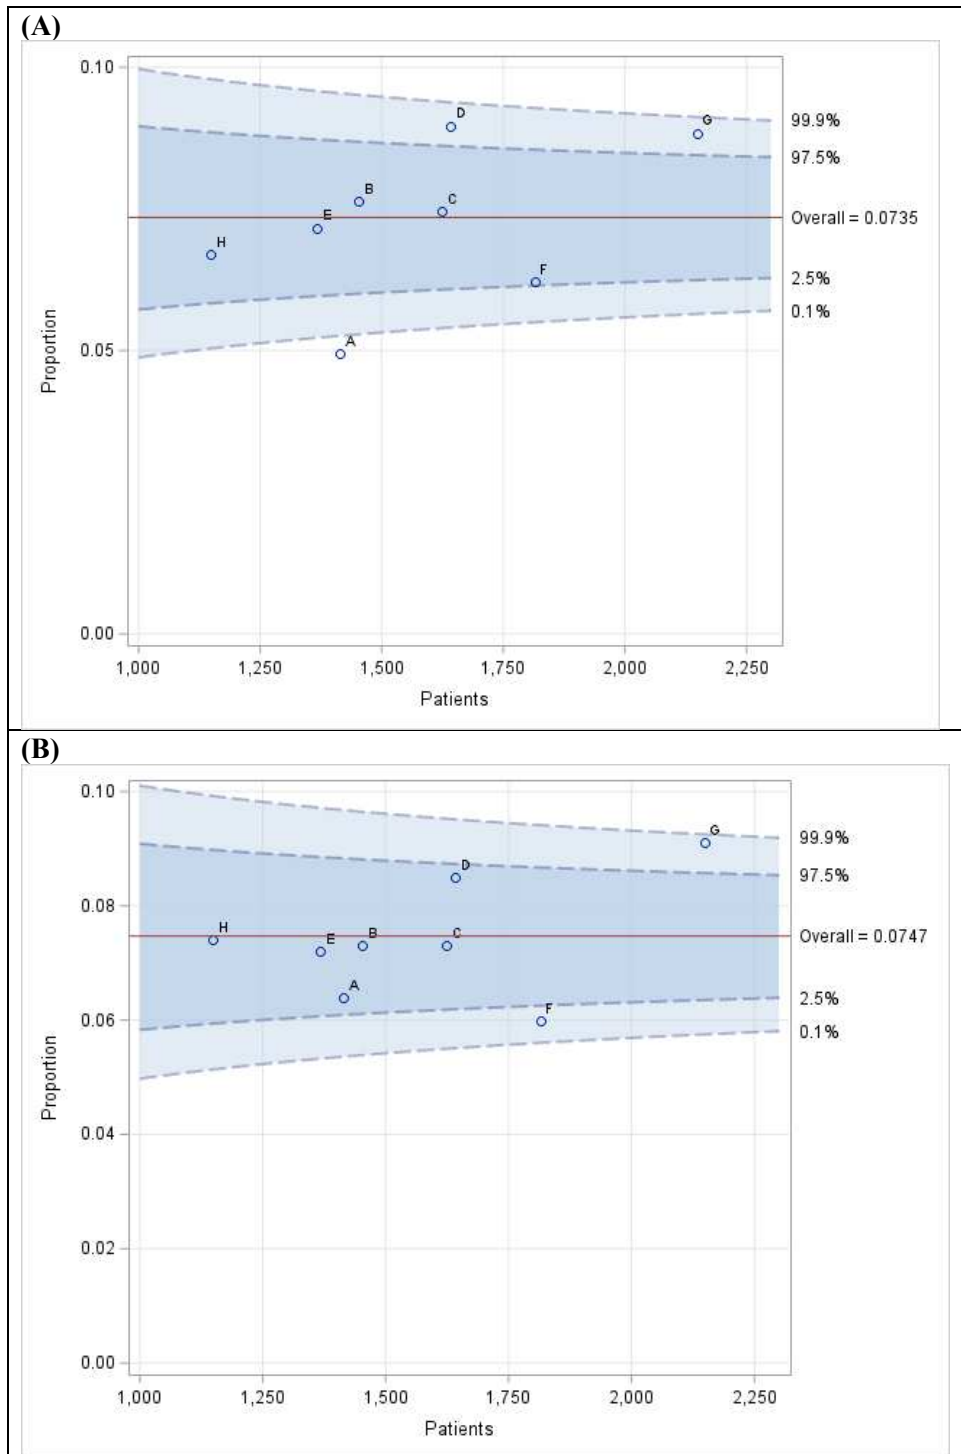

**Figure 12: Home oxygen.**

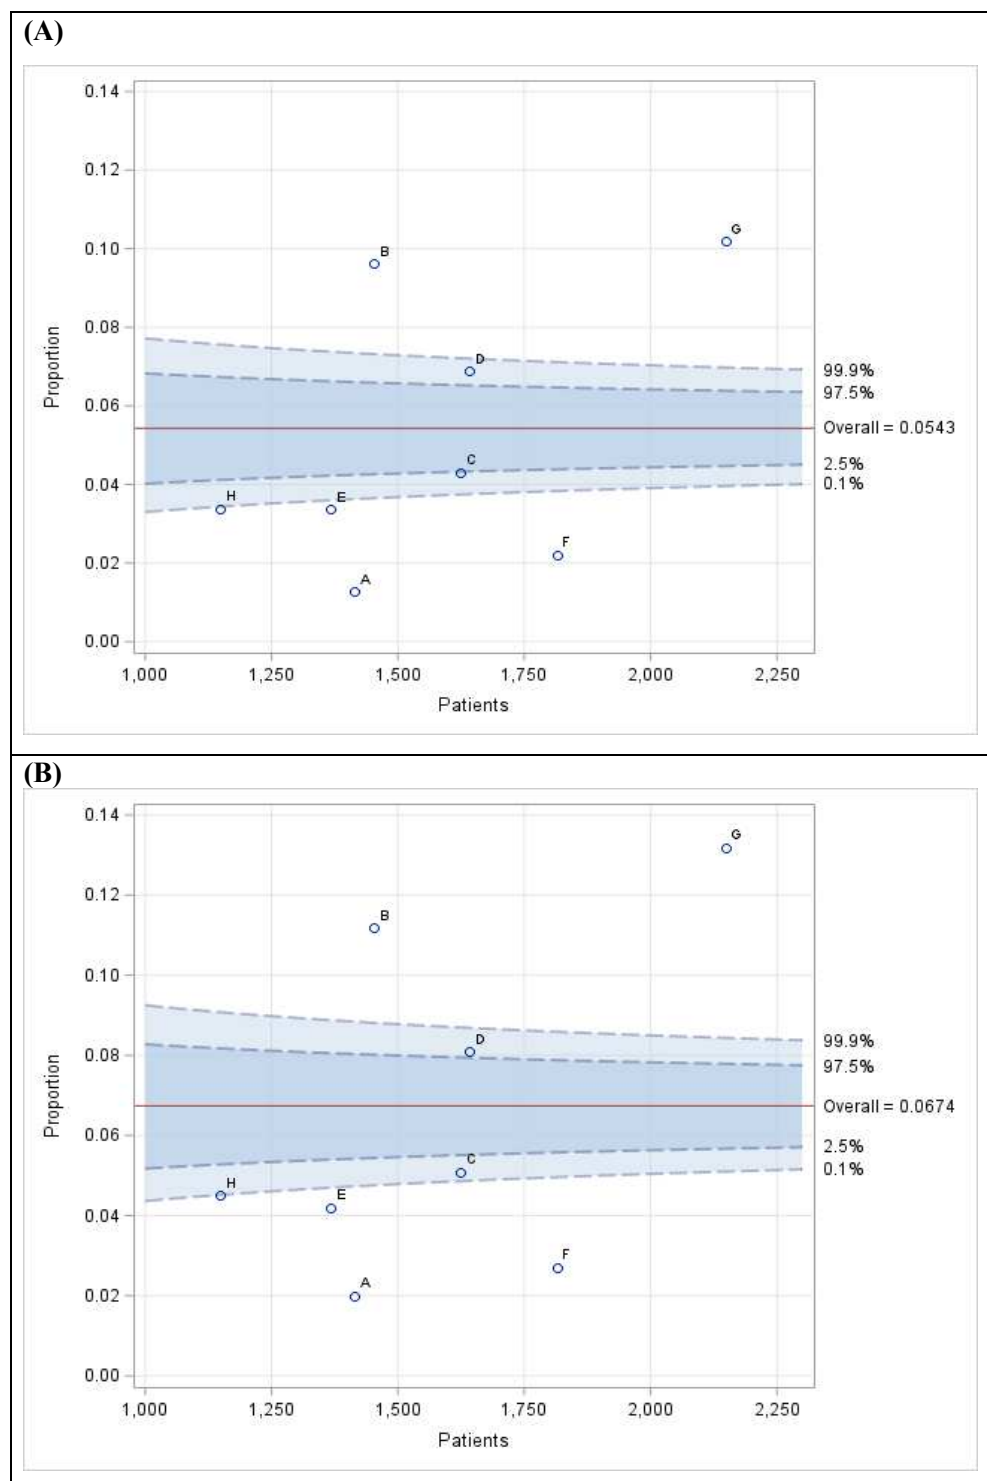

**Supplementary Table 1 to 12: Risk factors associated with each morbidity used for adjusted rates**

Table 1: Proven early sepsis

Table 2: Proven late sepsis

Table 3: Intraventricular haemorrhage grade III/IV

Table 4: Medically treated patent ductus arteriosus

Table 5: Surgically treated patent ductus arteriosus

Table 6: Necrotising enterocolitis clinically or proven radiologically or at surgery

Table 7: Chronic lung disease

Table 8: Postnatal steroids for chronic lung disease

Table 9: Retinopathy of prematurity grade III to V

Table 10: Surgery for retinopathy of prematurity

Table 11: Hospital mortality

Table 12: Home oxygen

**Table 1:** Proven early sepsis

| <b>Characteristics*</b>                                    | <b>aOR</b> | <b>95%CI</b> |       | <b>p-value</b> |
|------------------------------------------------------------|------------|--------------|-------|----------------|
| Apgar score at 5mins $\leq 7$ (yes vs. no)                 | 0.321      | 0.246        | 0.419 | <.0001         |
| Birth weight percentile ( $\geq 10$ vs. $< 10$ percentile) | 0.883      | 0.492        | 1.582 | 0.6749         |
| Chorioamnionitis (yes vs. no)                              | 0.294      | 0.223        | 0.388 | <.0001         |
| Type of delivery (non-caesarean vs. caesarean section)     | 1.073      | 0.815        | 1.412 | 0.6163         |
| Ethnicity (Indigenous vs. non-Indigenous Australian)       | 1.136      | 0.676        | 1.911 | 0.63           |
| Gestational age (27-29 vs. $\leq 26$ weeks)                | 0.962      | 0.669        | 1.383 | 0.8333         |
| Gestational age (30-31 vs. $\leq 26$ weeks)                | 0.96       | 0.676        | 1.364 | 0.821          |
| Sex (male vs. female)                                      | 1.048      | 0.807        | 1.361 | 0.7253         |
| Multiple pregnancy (yes vs. no)                            | 1.551      | 1.098        | 2.19  | 0.0127         |
| Major congenital anomaly (yes vs. no)                      | 0.738      | 0.454        | 1.199 | 0.2199         |
| Major surgery (yes vs. no)                                 | 1.431      | 0.797        | 2.57  | 0.2296         |
| Place of birth (outborn vs. inborn)                        | 0.871      | 0.547        | 1.386 | 0.5605         |
| Antenatal corticosteroids (yes vs. none)                   | 0.977      | 0.589        | 1.62  | 0.9281         |

\*C-statistic 0.72.



**Table 2:** Proven late sepsis

| <b>Characteristics*</b>                                    | <b>aOR</b> | <b>95%CI</b> |       | <b>p-value</b> |
|------------------------------------------------------------|------------|--------------|-------|----------------|
| Apgar score at 5mins $\leq 7$ (yes vs. no)                 | 1.109      | 0.973        | 1.264 | 0.1228         |
| Birth weight percentile ( $\geq 10$ vs. $< 10$ percentile) | 1.038      | 0.851        | 1.266 | 0.7127         |
| Chorioamnionitis (yes vs. no)                              | 0.949      | 0.84         | 1.072 | 0.3999         |
| Type of delivery (non-caesarean vs. caesarean section)     | 1.072      | 0.959        | 1.199 | 0.2202         |
| Ethnicity (Indigenous vs. non-Indigenous Australian)       | 1.106      | 0.91         | 1.344 | 0.311          |
| Gestational age (27-29 vs. $\leq 26$ weeks)                | 0.279      | 0.249        | 0.313 | $< .0001$      |
| Gestational age (30-31 vs. $\leq 26$ weeks)                | 0.088      | 0.076        | 0.101 | $< .0001$      |
| Sex (male vs. female)                                      | 0.978      | 0.881        | 1.085 | 0.6698         |
| Multiple pregnancy (yes vs. no)                            | 0.971      | 0.864        | 1.091 | 0.6243         |
| Major congenital anomaly (yes vs. no)                      | 0.79       | 0.623        | 1.003 | 0.0526         |
| Major surgery (yes vs. no)                                 | 1.143      | 0.913        | 1.43  | 0.2434         |
| Place of birth (outborn vs. inborn)                        | 1.094      | 0.911        | 1.312 | 0.336          |
| Antenatal corticosteroids (yes vs. none)                   | 1.001      | 0.816        | 1.228 | 0.9935         |

\*C-statistic 0.74.

**Table 3:** Intraventricular haemorrhage grade III and IV

| <b>Characteristics*</b>                                    | <b>aOR</b> | <b>95%CI</b> |       | <b>p-value</b> |
|------------------------------------------------------------|------------|--------------|-------|----------------|
| Apgar score at 5mins $\leq 7$ (yes vs. no)                 | 1.025      | 0.81         | 1.297 | 0.8382         |
| Birth weight percentile ( $\geq 10$ vs. $< 10$ percentile) | 1.363      | 0.927        | 2.005 | 0.1157         |
| Chorioamnionitis (yes vs. no)                              | 1.039      | 0.84         | 1.284 | 0.7255         |
| Type of delivery (non-caesarean vs. caesarean section)     | 1.013      | 0.833        | 1.232 | 0.8978         |
| Ethnicity (Indigenous vs. non-Indigenous Australian)       | 1.053      | 0.749        | 1.48  | 0.7677         |
| Gestational age (27-29 vs. $\leq 26$ weeks)                | 1.03       | 0.748        | 1.418 | 0.8566         |
| Gestational age (30-31 vs. $\leq 26$ weeks)                | 1.085      | 0.788        | 1.493 | 0.6171         |
| Sex (male vs. female)                                      | 1.292      | 0.873        | 1.913 | 0.2004         |
| Multiple pregnancy (yes vs. no)                            | 0.924      | 0.771        | 1.108 | 0.396          |
| Major congenital anomaly (yes vs. no)                      | 0.754      | 0.607        | 0.936 | 0.0103         |
| Major surgery (yes vs. no)                                 | 0.837      | 0.551        | 1.27  | 0.403          |
| Place of birth (outborn vs. inborn)                        | 1.14       | 0.77         | 1.687 | 0.5128         |
| Antenatal corticosteroids (yes vs. none)                   | 1.018      | 0.74         | 1.4   | 0.9147         |

\*C-statistic 0.552.

**Table 4:** Medically treated patent ductus arteriosus

| <b>Characteristics*</b>                                   | <b>aOR</b> | <b>95%CI</b> |       | <b>p-value</b> |
|-----------------------------------------------------------|------------|--------------|-------|----------------|
| Apgar score at 5mins $\leq 7$ (yes vs. no)                | 0.987      | 0.87         | 1.12  | 0.8389         |
| Birth weight percentile ( $\geq 10$ vs $< 10$ percentile) | 1.087      | 0.9          | 1.313 | 0.3874         |
| Chorioamnionitis (yes vs. no)                             | 0.913      | 0.813        | 1.026 | 0.1271         |
| Type of delivery (non-caesarean vs. caesarean section)    | 1.03       | 0.926        | 1.145 | 0.5891         |
| Ethnicity (Indigenous vs. non-Indigenous Australian)      | 0.93       | 0.767        | 1.127 | 0.46           |
| Gestational age (27-29 vs. $\leq 26$ weeks)               | 0.197      | 0.177        | 0.219 | $< .0001$      |
| Gestational age (30-31 vs. $\leq 26$ weeks)               | 0.025      | 0.021        | 0.029 | $< .0001$      |
| Sex (male vs. female)                                     | 0.923      | 0.835        | 1.019 | 0.1116         |
| Multiple pregnancy (yes vs. no)                           | 0.971      | 0.869        | 1.084 | 0.6003         |
| Major congenital anomaly (yes vs. no)                     | 0.814      | 0.653        | 1.015 | 0.0681         |
| Major surgery (yes vs. no)                                | 1.3        | 1.051        | 1.607 | 0.0156         |
| Place of birth (outborn vs. inborn)                       | 1.048      | 0.879        | 1.249 | 0.6029         |
| Antenatal corticosteroids (yes vs. none)                  | 0.855      | 0.705        | 1.037 | 0.1112         |

\*C-statistic 0.82.

**Table 5:** Surgically treated patent ductus arteriosus

| <b>Characteristics*</b>                                    | <b>aOR</b> | <b>95%CI</b> |       | <b>p-value</b> |
|------------------------------------------------------------|------------|--------------|-------|----------------|
| Apgar score at 5mins $\leq 7$ (yes vs. no)                 | 1.171      | 0.863        | 1.589 | 0.3115         |
| Birth weight percentile ( $\geq 10$ vs. $< 10$ percentile) | 1.01       | 0.641        | 1.591 | 0.9647         |
| Chorioamnionitis (yes vs. no)                              | 1.118      | 0.838        | 1.492 | 0.4464         |
| Type of delivery (non-caesarean vs. caesarean section)     | 0.761      | 0.577        | 1.003 | 0.0522         |
| Ethnicity (Indigenous vs. non-Indigenous Australian)       | 0.968      | 0.598        | 1.568 | 0.8948         |
| Gestational age (27-29 vs. $\leq 26$ weeks)                | 0.23       | 0.174        | 0.305 | $< .0001$      |
| Gestational age (30-31 vs. $\leq 26$ weeks)                | 0.063      | 0.041        | 0.096 | $< .0001$      |
| Sex (male vs. female)                                      | 1.083      | 0.842        | 1.391 | 0.536          |
| Multiple pregnancy (yes vs. no)                            | 1.032      | 0.782        | 1.36  | 0.8255         |
| Major congenital anomaly (yes vs. no)                      | 0.773      | 0.436        | 1.37  | 0.3778         |
| Major surgery (yes vs. no)                                 | 1.516      | 0.94         | 2.446 | 0.0882         |
| Place of birth (outborn vs. inborn)                        | 0.913      | 0.574        | 1.452 | 0.7003         |
| Antenatal corticosteroids (yes vs. none)                   | 0.888      | 0.545        | 1.445 | 0.632          |

\*C-statistic 0.77.

**Table 6:** Necrotising enterocolitis clinically or proven radiologically or at surgery

| <b>Characteristics*</b>                                    | <b>aOR</b> | <b>95%CI</b> |       | <b>p-value</b> |
|------------------------------------------------------------|------------|--------------|-------|----------------|
| Apgar score at 5mins $\leq 7$ (yes vs. no)                 | 0.702      | 0.559        | 0.883 | 0.0024         |
| Birth weight percentile ( $\geq 10$ vs. $< 10$ percentile) | 2.789      | 2.082        | 3.736 | $< .0001$      |
| Chorioamnionitis (yes vs. no)                              | 0.674      | 0.536        | 0.849 | 0.0008         |
| Type of delivery (non-caesarean vs. caesarean section)     | 1.066      | 0.85         | 1.336 | 0.58           |
| Ethnicity (Indigenous vs. non-Indigenous Australian)       | 1.588      | 0.999        | 2.524 | 0.0506         |
| Gestational age (27-29 vs. $\leq 26$ weeks)                | 1.182      | 0.898        | 1.556 | 0.2325         |
| Gestational age (30-31 vs. $\leq 26$ weeks)                | 1.131      | 0.869        | 1.474 | 0.3598         |
| Sex (male vs. female)                                      | 0.759      | 0.617        | 0.934 | 0.0092         |
| Multiple pregnancy (yes vs. no)                            | 1.064      | 0.844        | 1.342 | 0.5971         |
| Major congenital anomaly (yes vs. no)                      | 2.06       | 1.457        | 2.913 | $< .0001$      |
| Major surgery (yes vs. no)                                 | 0.043      | 0.035        | 0.054 | $< .0001$      |
| Place of birth (outborn vs. inborn)                        | 1.099      | 0.733        | 1.648 | 0.6484         |
| Antenatal corticosteroids (yes vs. none)                   | 0.934      | 0.61         | 1.43  | 0.7538         |

\*C-statistic 0.77.

**Table 7:** Chronic lung disease

| <b>Characteristics*</b>                                    | <b>aOR</b> | <b>95%CI</b> |       | <b>p-value</b> |
|------------------------------------------------------------|------------|--------------|-------|----------------|
| Apgar score at 5mins $\leq 7$ (yes vs. no)                 | 0.518      | 0.466        | 0.576 | <.0001         |
| Birth weight percentile ( $\geq 10$ vs. $< 10$ percentile) | 3.33       | 2.875        | 3.858 | <.0001         |
| Chorioamnionitis (yes vs. no)                              | 0.65       | 0.587        | 0.721 | <.0001         |
| Type of delivery (non-caesarean vs. caesarean section)     | 0.951      | 0.861        | 1.05  | 0.323          |
| Ethnicity (Indigenous vs. non-Indigenous Australian)       | 0.864      | 0.728        | 1.025 | 0.0929         |
| Gestational age (27-29 vs. $\leq 26$ weeks)                | 1.018      | 0.898        | 1.153 | 0.7841         |
| Gestational age (30-31 vs. $\leq 26$ weeks)                | 1.039      | 0.92         | 1.172 | 0.5382         |
| Sex (male vs. female)                                      | 0.878      | 0.801        | 0.962 | 0.0054         |
| Multiple pregnancy (yes vs. no)                            | 1.116      | 1.005        | 1.239 | 0.0393         |
| Major congenital anomaly (yes vs. no)                      | 0.535      | 0.451        | 0.635 | <.0001         |
| Major surgery (yes vs. no)                                 | 0.181      | 0.153        | 0.215 | <.0001         |
| Place of birth (outborn vs. inborn)                        | 1.301      | 1.092        | 1.551 | 0.0033         |
| Antenatal corticosteroids (yes vs. none)                   | 0.843      | 0.698        | 1.019 | 0.0768         |

\*C-statistic 0.72.

**Table 8:** Postnatal steroid for chronic lung disease

| <b>Characteristics*</b>                                    | <b>aOR</b> | <b>95%CI</b> |       | <b>p-value</b> |
|------------------------------------------------------------|------------|--------------|-------|----------------|
| Apgar score at 5mins $\leq 7$ (yes vs. no)                 | 0.41       | 0.35         | 0.481 | <.0001         |
| Birth weight percentile ( $\geq 10$ vs. $< 10$ percentile) | 2.454      | 1.948        | 3.092 | <.0001         |
| Chorioamnionitis (yes vs. no)                              | 0.525      | 0.446        | 0.618 | <.0001         |
| Type of delivery (non-caesarean vs. caesarean section)     | 0.748      | 0.637        | 0.879 | 0.0004         |
| Ethnicity (Indigenous vs. non-Indigenous Australian)       | 1.135      | 0.837        | 1.539 | 0.4136         |
| Gestational age (27-29 vs. $\leq 26$ weeks)                | 1.058      | 0.863        | 1.296 | 0.5891         |
| Gestational age (30-31 vs. $\leq 26$ weeks)                | 1.095      | 0.899        | 1.334 | 0.3686         |
| Sex (male vs. female)                                      | 0.711      | 0.609        | 0.829 | <.0001         |
| Multiple pregnancy (yes vs. no)                            | 0.996      | 0.838        | 1.184 | 0.9666         |
| Major congenital anomaly (yes vs. no)                      | 0.704      | 0.553        | 0.896 | 0.0043         |
| Major surgery (yes vs. no)                                 | 0.166      | 0.136        | 0.202 | <.0001         |
| Place of birth (outborn vs. inborn)                        | 1.441      | 1.059        | 1.962 | 0.0202         |
| Antenatal corticosteroids (yes vs. none)                   | 0.887      | 0.649        | 1.212 | 0.4529         |

\*C-statistic 0.74.

**Table 9:** Retinopathy of prematurity grade III to V

| <b>Characteristics*</b>                                    | <b>aOR</b> | <b>95%CI</b> |       | <b>p-value</b> |
|------------------------------------------------------------|------------|--------------|-------|----------------|
| Apgar score at 5mins $\leq 7$ (yes vs. no)                 | 0.429      | 0.355        | 0.518 | <.0001         |
| Birth weight percentile ( $\geq 10$ vs. $< 10$ percentile) | 2.485      | 1.881        | 3.283 | <.0001         |
| Chorioamnionitis (yes vs. no)                              | 0.474      | 0.392        | 0.574 | <.0001         |
| Type of delivery (non-caesarean vs. caesarean section)     | 0.579      | 0.478        | 0.7   | <.0001         |
| Ethnicity (Indigenous vs. non-Indigenous Australian)       | 1.169      | 0.815        | 1.676 | 0.3963         |
| Gestational age (27-29 vs. $\leq 26$ weeks)                | 0.964      | 0.756        | 1.228 | 0.7642         |
| Gestational age (30-31 vs. $\leq 26$ weeks)                | 0.997      | 0.787        | 1.262 | 0.9768         |
| Sex (male vs. female)                                      | 1.065      | 0.893        | 1.27  | 0.4821         |
| Multiple pregnancy (yes vs. no)                            | 0.969      | 0.791        | 1.188 | 0.7624         |
| Major congenital anomaly (yes vs. no)                      | 0.813      | 0.605        | 1.091 | 0.1678         |
| Major surgery (yes vs. no)                                 | 0.208      | 0.166        | 0.261 | <.0001         |
| Place of birth (outborn vs. inborn)                        | 1.206      | 0.855        | 1.701 | 0.2864         |
| Antenatal corticosteroids (yes vs. none)                   | 0.92       | 0.63         | 1.342 | 0.6647         |

\*C-statistic 0.66.



**Table 10:** Surgery for retinopathy of prematurity

| <b>Characteristics*</b>                                    | <b>aOR</b> | <b>95%CI</b> |       | <b>p-value</b> |
|------------------------------------------------------------|------------|--------------|-------|----------------|
| Apgar score at 5mins $\leq 7$ (yes vs. no)                 | 0.421      | 0.339        | 0.524 | <.0001         |
| Birth weight percentile ( $\geq 10$ vs. $< 10$ percentile) | 2.734      | 1.987        | 3.762 | <.0001         |
| Chorioamnionitis (yes vs. no)                              | 0.62       | 0.494        | 0.777 | <.0001         |
| Type of delivery (non-caesarean vs. caesarean section)     | 0.561      | 0.448        | 0.702 | <.0001         |
| Ethnicity (Indigenous vs. non-Indigenous Australian)       | 1.089      | 0.719        | 1.649 | 0.688          |
| Gestational age (27-29 vs. $\leq 26$ weeks)                | 1.067      | 0.805        | 1.414 | 0.6538         |
| Gestational age (30-31 vs. $\leq 26$ weeks)                | 1.097      | 0.834        | 1.442 | 0.5077         |
| Sex (male vs. female)                                      | 1.144      | 0.929        | 1.409 | 0.2052         |
| Multiple pregnancy (yes vs. no)                            | 1.134      | 0.886        | 1.452 | 0.3163         |
| Major congenital anomaly (yes vs. no)                      | 1.083      | 0.757        | 1.548 | 0.6633         |
| Major surgery (yes vs. no)                                 | 0.173      | 0.133        | 0.224 | <.0001         |
| Place of birth (outborn vs. inborn)                        | 1.284      | 0.861        | 1.916 | 0.2208         |
| Antenatal corticosteroids (yes vs. none)                   | 1.144      | 0.772        | 1.694 | 0.5027         |

\*C-statistic 0.73.

**Table 11:** Hospital mortality

| <b>Characteristics*</b>                                    | <b>aOR</b> | <b>95%CI</b> |       | <b>p-value</b> |
|------------------------------------------------------------|------------|--------------|-------|----------------|
| Apgar score at 5mins $\leq 7$ (yes vs. no)                 | 5.473      | 4.732        | 6.332 | <.0001         |
| Birth weight percentile ( $\geq 10$ vs. $< 10$ percentile) | 0.447      | 0.356        | 0.561 | <.0001         |
| Chorioamnionitis (yes vs. no)                              | 1.245      | 1.06         | 1.463 | 0.0077         |
| Type of delivery (non-caesarean vs. caesarean section)     | 1.531      | 1.313        | 1.785 | <.0001         |
| Ethnicity (Indigenous vs. non-Indigenous Australian)       | 0.966      | 0.731        | 1.276 | 0.8059         |
| Gestational age (27-29 vs. $\leq 26$ weeks)                | 0.861      | 0.708        | 1.047 | 0.133          |
| Gestational age (30-31 vs. $\leq 26$ weeks)                | 0.911      | 0.756        | 1.099 | 0.3313         |
| Sex (male vs. female)                                      | 1.22       | 1.054        | 1.412 | 0.0076         |
| Multiple pregnancy (yes vs. no)                            | 1.072      | 0.909        | 1.264 | 0.4089         |
| Major congenital anomaly (yes vs. no)                      | 2.588      | 2.069        | 3.236 | <.0001         |
| Major surgery (yes vs. no)                                 | 1.056      | 0.813        | 1.373 | 0.6818         |
| Place of birth (outborn vs. inborn)                        | 0.782      | 0.61         | 1.002 | 0.0519         |
| Antenatal corticosteroids (yes vs. none)                   | 0.52       | 0.413        | 0.655 | <.0001         |

\*C-statistic 0.74.

**Table 12:** Home oxygen

| <b>Characteristics*</b>                                    | <b>aOR</b> | <b>95%CI</b> |       | <b>p-value</b> |
|------------------------------------------------------------|------------|--------------|-------|----------------|
| Apgar score at 5mins $\leq 7$ (yes vs. no)                 | 0.51       | 0.427        | 0.608 | <.0001         |
| Birth weight percentile ( $\geq 10$ vs. $< 10$ percentile) | 2.497      | 1.961        | 3.179 | <.0001         |
| Chorioamnionitis (yes vs. no)                              | 0.724      | 0.604        | 0.867 | 0.0005         |
| Type of delivery (non-caesarean vs. caesarean section)     | 0.751      | 0.63         | 0.896 | 0.0014         |
| Ethnicity (Indigenous vs. non-Indigenous Australian)       | 1.087      | 0.785        | 1.505 | 0.6161         |
| Gestational age (27-29 vs. $\leq 26$ weeks)                | 0.991      | 0.796        | 1.235 | 0.9359         |
| Gestational age (30-31 vs. $\leq 26$ weeks)                | 1.103      | 0.889        | 1.368 | 0.3748         |
| Sex (male vs. female)                                      | 0.784      | 0.664        | 0.926 | 0.0042         |
| Multiple pregnancy (yes vs. no)                            | 1.37       | 1.123        | 1.671 | 0.0019         |
| Major congenital anomaly (yes vs. no)                      | 0.819      | 0.617        | 1.088 | 0.1679         |
| Major surgery (yes vs. no)                                 | 0.378      | 0.295        | 0.483 | <.0001         |
| Place of birth (outborn vs. inborn)                        | 1.308      | 0.945        | 1.811 | 0.1057         |
| Antenatal corticosteroids (yes vs. none)                   | 0.749      | 0.525        | 1.069 | 0.1109         |

\*C-statistic 0.68.
